# Supplementary material
Source: publisher figshare collection journal article supplement (https://frontiersin.figshare.com/ndownloader/files/35684285)
Supplement: Supplementary file 1 [file 35684285]

## Sheet: Sheet1
Sequence information including species name, GenBank accession number and sampling localities of 19 cytb for ancestral range reconstruction
species	ID	GenBank accession	Sampling localities	Locations in RASP
Hemiculter bleekeri	ZG31	KF021205	Zigui, Yichang, Hubei	B
Hemiculter bleekeri	JY3	KF020986	Jiayu, Xianning, Hubei	C
Hemiculter leucisclus	BB1	KY292567	Bobai, Yulin, Guangxi	D
Hemiculter leucisclus	WQH	AY089710	Wanquanhe, Hainan	D
Hemiculter leucisclus	BH0502	MW006120	Nanliujiang River;Beihai (Guangxi)	D
Hemiculter leucisclus	LS14	KY292613	Lingshan, Qinzhou, Guangxi	D
Hemiculter leucisclus	LZ1	KF021047	Luzhou, Sichuan	B
Hemiculter leucisclus	MD12	KF021078	Mudong, Chongqing	B
Hemiculter leucisclus	HJ4	KF021220	Hejiang, Luzhou, Sichuan	B
Hemiculter leucisclus	LZH14	KF021002	Liangzhihu Lake, Ezhou, Hubei	C
Hemiculter leucisclus	KF5	MW006194	Kaifeng, Henan	A
Hemiculter leucisclus	KM005	MW006213	Kunming, Yunnan	B
Hemiculter leucisclus	TE6	KY292634	Tian’e, Hechi, Guangxi	D
Hemiculter leucisclus	YS1	ON315511	Yanshi, Luoyang, Henan	A
Hemiculter leucisclus	LA1	KY292638	Gongguoqiao, Dali, Yunnan	G
Hemiculter leucisclus	WTQ1	KF021142	Wutongqiao, Leshan, Sichuan	B
Hemiculter leucisclus	DTH29	KF020946	Dongting Lake, Yueyang, Hunan	C
Hemiculter leucisclus	SH1	ON315569	Shihe, Xinyang, Henan	E
Hemiculter leucisclus	QT1	MW006279	Qiantangjiang, Zhejiang	F
